# Supplementary material
Source: PubMed Central journal article supplement (PMC5544172)
Supplement: Supplementary_Material.pdf [file Supplementary_Material.pdf]

**Supplementary Table S1** Primers for qPCR.

| gene          | NM ID        | Forward                          | Reverse                               | Length<br>(bp) |
|---------------|--------------|----------------------------------|---------------------------------------|----------------|
| <i>Map3k7</i> | NM_009316    | 5'-AGTATGTCTTGATG<br>GAATA-3'    | 5'-GTGTAGTAAGGCA<br>ATGGT-3'          | 81             |
| <i>Mapk14</i> | NM_001168514 | 5'-TGTTCTGTCTATCTCA<br>CTTC-3'   | 5'-GAGGCACTTGAAT<br>GGTAT-3'          | 75             |
| <i>Atf2</i>   | NM_001025093 | 5'-GGCGTTCAAGCAGGA<br>TTC -3'    | 5'-<br>TGACACTGAGACCAT<br>AGCAATA -3' | 106            |
| <i>Pparg</i>  | NM_001127330 | 5'-<br>GCATCAGGCTTCCACTAT<br>-3' | 5'-<br>CTTCAATCGGATGGTT<br>CTTC -3'   | 75             |

*Map3k7*: mitogen-activated protein kinase kinase kinase 7; *Mapk14*: mitogen-activated protein kinase 14; *Atf2*: activating transcription factor 2; *Pparg*: peroxisome proliferator activated receptor gamma

**Supplementary Table S2** The list of differential expression miRNAs identified in RC group (fold change<2,  $P<0.05$ ).

| miRNA                          | Fold change | P-value               | Mature sequence          |
|--------------------------------|-------------|-----------------------|--------------------------|
| <b>Upregulated miRNAs</b>      |             |                       |                          |
| mmu-miR-25-5p                  | 2.64        | $1.28 \times 10^{-3}$ | AGGCGGAGACUUGGGCAAUUGC   |
| mmu-miR-291b-5p                | 2.80        | $1.67 \times 10^{-2}$ | GAUCAAAGUGGAGGCCCUCCUCC  |
| mmu-miR-504-3p                 | 2.79        | $2.39 \times 10^{-5}$ | AGGGAGAGCAGGGCAGGGUUUC   |
| mmu-miR-1947-3p                | 3.33        | $1.01 \times 10^{-3}$ | GCACUGAGCUAGCUCUCCCUCC   |
| mmu-miR-7014-5p                | 3.90        | $1.59 \times 10^{-5}$ | UUGGGUGCUGUGGAAGGGACAG   |
| mmu-miR-7025-5p                | 2.18        | $6.51 \times 10^{-5}$ | CGUGAGCUGAAGCUGGUGGCUCCC |
| <b>Downregulated microRNAs</b> |             |                       |                          |
| mmu-miR-149-5p                 | 0.444       | $1.72 \times 10^{-4}$ | UCUGGCUCCGUGUCUUCACUCCC  |
| mmu-miR-151-5p                 | 0.365       | $1.27 \times 10^{-6}$ | UCGAGGAGCUCACAGUCUAGU    |
| mmu-miR-324-3p                 | 0.450       | $6.36 \times 10^{-4}$ | CCACUGCCCCAGGUGCUGCU     |
| mmu-miR-338-5p                 | 0.469       | $2.17 \times 10^{-6}$ | AACAAUAUCCUGGUGCUGAGUG   |
| mmu-miR-351-5p                 | 0.411       | $5.84 \times 10^{-5}$ | UCCCUGAGGAGCCCUUUGAGCCUG |
| mmu-miR-181b-5p                | 0.342       | $2.78 \times 10^{-5}$ | AACAUUCAUUGCUGUCGGUGGGU  |
| mmu-miR-125b-1-3p              | 0.403       | $2.44 \times 10^{-5}$ | ACGGGUUAGGCUCUUGGGAGCU   |
| mmu-miR-674-5p                 | 0.247       | $8.68 \times 10^{-6}$ | GCACUGAGAUGGGAGUGGUGUA   |

**Supplementary Table S3** Validated miRNA target for the miRNAs differentially expressed in RC group, compared with CC group.

| miRNA          | regulation | Target genes                                                                                                                                                                                                                                                                                                                                                                                                                                                                                                                                                                                                                                                                                                                                                                                                                                                                                                                                                                                                                                                                                                                                                                                                                                                                                                                                                                                                                                                                                                                                                                                                                                                                                                                                                                                                                                                                                                                                                                                                                                                                                                                                                                                                                                                                                                                                                                                                                                                                                                                                                                                                                                                                                                                                                                                                                                                                                                                 |
|----------------|------------|------------------------------------------------------------------------------------------------------------------------------------------------------------------------------------------------------------------------------------------------------------------------------------------------------------------------------------------------------------------------------------------------------------------------------------------------------------------------------------------------------------------------------------------------------------------------------------------------------------------------------------------------------------------------------------------------------------------------------------------------------------------------------------------------------------------------------------------------------------------------------------------------------------------------------------------------------------------------------------------------------------------------------------------------------------------------------------------------------------------------------------------------------------------------------------------------------------------------------------------------------------------------------------------------------------------------------------------------------------------------------------------------------------------------------------------------------------------------------------------------------------------------------------------------------------------------------------------------------------------------------------------------------------------------------------------------------------------------------------------------------------------------------------------------------------------------------------------------------------------------------------------------------------------------------------------------------------------------------------------------------------------------------------------------------------------------------------------------------------------------------------------------------------------------------------------------------------------------------------------------------------------------------------------------------------------------------------------------------------------------------------------------------------------------------------------------------------------------------------------------------------------------------------------------------------------------------------------------------------------------------------------------------------------------------------------------------------------------------------------------------------------------------------------------------------------------------------------------------------------------------------------------------------------------------|
| mmu-miR-149-5p | down       | <i>Macf1, Acvr1b, Adsl, Aicda, Akt1, Aldoc, Atg5, Arc, Astn1, Atp2a2, Slc7a1, Atrn, Bach1, Fabp7, Calr, Camk2g, Capns1, Ctnnd1, Cbln1, Cbx1, Cbx5, Entpd6, Tpp1, CpoX, Crkl, Cxadr, Ddx3x, Dgcr2, Dok1, Efna5, Epb4.1l1, Epha4, Ephb3, F3, Fem1b, Fkbp1b, Lpin1, Fnbp1, Fut9, Gab1, Gabrb2, Gnao1, Gng7, Gpc1, Pigq, Gria1, Grm1, Gtf2i, Hnrnpa1, Hspg2, Htr5a, Ifngr2, Igfbp5, Ikbkg, Irak1, Il1rap, Il5ra, Il6st, Inpp5b, Itpa, Itsn1, Kcnc1, Kcnj10, Kcnj16, Kcnj3, Kif1b, Kifap3, Kit, Lfn g, Lhx1, Smad7, Mbp, Mdm4, Mecp2, Mmp15, Myo10, Nedd4, Nf1, Nfia, Nfix, Nptx1, Nrp2, Ntrk2, Pafah1b2, Furin, Pdgfrb, Pea15a, Per2, Phka1, Papola, Plec, Plxna2, Prkab1, Prnp, Ptgfrn, Ptpn11, Ptpn12, Ptpn4, Ptpn5, Ptprd, Rdx, Sart1, Scd2, Scn1a, Scn8a, Cxcl12, Nptn, Sema4a, 42621, Sez6, St8sia3, Slc1a1, Soat1, Sptbn2, Sdc3, Syt2, Slc6a6, Tef, Tex264, Timp3, Tspan7, Tnks, Ttc3, Ube2i, Usp10, Ugcg, Ulk1, Vamp2, Vldlr, Wdr1, Zmat3, Ybx1, Ybx1, Ywhag, Slc30a4, Mid2, Mmp17, Dazap2, Axl, Btd, Map3k7, Mapk9, Git2, Sema4g, Vat1, Cul1, Add3, Ip6k1, Nrep, Med10, Tinf2, Tomm70a, Igfbp7, Pde7b, Zfp354c, Tmod2, Uba2, Rnf24, Kcnc6, Kcnc6, Reep1, Coa3, Mettl2, Ccdc43, Sdcbp, Reck, Gria3, Map3k14, Rfx5, Rragc, Elovl2, Ywhab, Syt6, Stam2, Txnip, Adar, Mtch1, Rapgef4, Pnk d, Aldh9a1, Scamp5, Sertad2, Hic2, Ppp1r1a, Fam129a, Nrgn, Gprc5b, Tws g1, Pno1, 2010012005Rik, Slc30a7, Sppl2a, Ppp1r2, Hmg20a, Pccb, Aagab, S sbp2, Tbc1d20, Gpr89, Luc7l3, Ppap2b, Rab14, Lmbrd1, Tmem109, Slc44a2, T rp53inp2, Elovl5, 1190002N15Rik, Zdhhc3, Ubr4, Elf2, Tmem127, Antxr1, Cdk 13, Dab2ip, Emc10, Sash1, Gprc5c, Polr3f, Atad2, Ecd, Med26, Sik3, Dusp16, Tr ak2, Naa40, Foxn3, Clmp, Zfp251, Cdadc1, Fam219a, Zcchc24, Slc37a3, Brap, Mvb12b, Reep4, Tmem135, Macro d2, Ccser2, Slc22a23, Setd7, lws1, Speer4 b, Sec14l1, Dpp8, Neto2, 8430419L09Rik, Zkscan1, Ddit4, Dhcr24, Asxl2, Arl5 a, Zbtb4, Mpp7, Srrm2, Cant1, Rap2a, Paqr4, Snx27, Adck4, Bicd2, 25100390 18Rik, Nkrf, Krba1, 6030458C11Rik, Cdk19, Ttyh3, Btbd19, Rictor, Zcchc4, N4 bp1, Plekha2, Tmem2, Zkscan8, Entpd7, Csnk1a1, Klf7, Ube2n, B3galt5, Arid4 b, Slc24a3, Hecw1, Wwtr1, Fam102a, Clp1, Camta1, Bsd c1, Slc15a4, Spred3, S f3b3, Tcta, Slc6a8, Nt5dc3, Synj1, Cnot6, Lmf2, Csd c2, Stk38, Slc39a3, Unc5b, Rnf144a, Atad3a, Rcc2, Rnf169, Zzz3, Ank2, Braf, Tmbim6, Cds2, Rad51c, Pofu t1, Elmo1, Caln1, Usp48, Edem1, Bcas3, Bptf, Thsd4, BC034090, Gm608, Rsrc2 , Lpcat1, Plekhh2, Tnrc6b, BC003965, BC003965, Fbxl16, Fbxl16, Fbxl16, Fbxl1 6, Slc43a2, Hip1, Rhbdd2, Camk1g, Nav1, Nhs1, Tns4, Trib2, Nol10, 4933426 M11Rik, Mylip, Mylip, Ska3, Fam49b, Gxylt1, Dbx2, Poglut1, Rnf165, Ablim1, Rab3gap1, R3hdm1, Zbtb41, Nmnat2, Kansl3, Zer1, Prrc2b, Mapkap1, Sestd 1, Ncoa5, Syt11, Otud7b, Rsb n1, Slc6a17, Ahcyl1, Ikbkap, BC026590, Efcab14, Slc10a4, Lmtk2, Mob1a, Wnk1, Dpy19l3, Tnrc6a, Arhgef10, Gramd1b, Zfp28</i> |

---

*Od, Zfp445, Ago1, Osbpl8, Cdr2l, Gpr68, BC030476, BC030476, Cadm2, Fem1c, Ralgapa2, Frem2, Rgp1, Tmem8b, 2900026A02Rik, Eln1, Prickle2, Nlgn3, Fktn, Mfrp, Bahcc1, Mtmr12, Ppp2r2c, Rab6b, Adamts16, Eif5a, Snhg11, Celf5, Zfyve27, Zbtb39, Cep95, Lrrc58, Ric3, Trank1, Ipcef1, Slc35e2, Fam102b, Acot11, Opcml, Ksr2, Cog3, Nr1d2, Shisa6, Rap1gap2, 2700089E24Rik, Crtc1, Tmtc1, Flrt1, Scn4b, Zfp941, Zyg11b, Zyg11b, Adcy1, Zbtb9, Gpr17, Efr3b, Zfp605*

mmu-miR-291b-5p up

*Rab27a, Bach2, H2-Q4, Hipk3, Ogdh, Ppp2r3d, Ptprg, Mettl2, Zfp113, Cdc37l1, Ttc14, Fndc1, Grap, Cdc42se2, Asxl2, Msi2, Cd300a, Nol10, Tmem136, Mcc, Zfp866*

mmu-miR-151-5p down

*Pdpk1, Rac2, Moap1, Csrnp3, Tbl1xr1, Efcab4a, Rinl, AK010878,*

mmu-miR-324-3p down

*Abl1, Abl2, Macf1, Chrna4, Acvr1b, Adam10, Adcyap1r1, Anxa5, Ap2a2, Astn1, Atp6v1b2, Atrn, Ngfrap1, Bmpr1a, Cacna2d3, Canx, Cttnb1, Cav2, Cbfb, Cbx5, Cfl2, Clcn4-2, Clock, Col12a1, Cplx1, Crat, Dpysl2, Dnajc5, Ncan,*

*Dag1, Dgcr2, Reep5, Drd2, Dvl2, Ednra, Eif1a, Epb4.1l2, Eps15, Evi, Fem1b, Gabra1, Gabrb2, Gda, Gfap, Gja1, Gnao1, Gnb1, Gpam, Gpc1, Gpm6b, Gria2, Gsp2, Gtf2i, H2-D1, Hdac6, Tfb2m, Sdc2, Hyal1, Igf1r, Il1r1, Kif1b, Kif5c,*

*Klf9, L1cam, Lfng, Lipa, Smad3, Smad4, Mecp2, Kitl, Mmp24, Cd200, Laptm4a, Myo6, Myt1, Ncam1, Nck1, Nedd4, Nfib, Nme1, Nos1, Nup50, Ntrk2, Ocln, Igbp1, Padi2, Pfkfb2, Pik3ca, Prkcb, Ppp3r1, Prkdc, Pex19, Rab5b, Rab6a, Rela, Ralgds, Rgl1, Rit1, Rock2, Ryk, Zfp106, Skil, Slc12a2, Slc12a7, Slc31a1, Smarca4, Snn, Stag1, Syp, Syt1, Slc6a6, Tcf4, Zeb1, Tgfbr2, Tln1, Tpm2, Nr2c2, Ttc3, Ugt8a, Ulk1, Utrn, Lin7c, Nrsn1, Ywhag, Zfp148, Dmtf1, G3bp2, Mid2, Tenm4, Tpra1, Zeb2, Map2k1, Mapk14, Cln8, Vat1, Etv3, Ept1, Fam104a, Rabgap1, Fbxw7, Fbxo18, Mapk6, Dkk3, Tmod2, Reep1, Esyt2, Tmx4, Ywhab, Pcnx, Sfmbt1, Stx8, Tmem131, Syncrip, Clip1, Mtch1, Ppp1r1a, Slc4a8, Itm2c, Tsc1, Arl6ip5, Rogdi, Bola2, Lrrc57, Lix1, Riok3, Mkrn2, Ccdc25, Wdr85, Rab3c, Jam2, Bag4, Ccdc127, Slc25a46, Mettl16, Ccdc50, Rabl3, Stx17, Zmym4, Ppp6c, Mdp1, Nmb, Pdzd2, Fam135a, Lmbrd1, Rmnd5a, Tmem109, Ppm1f, Acss1, Ankrd46, Srrm4, 2810407C02Rik, Antxr1, Usp46, Acot7, Cpm, Ap2b1, March8, Ppapdc1b, Rap2c, Katnbl1, Pan3, Tmem135, Slc22a23, Psmb11, Arpp21, 4931428F04Rik, Asxl2, Ttpal, Slc24a2, Faf2, Klhdc10, Tanc2, Heg1, Hook1, Nuak1, Ttyh3, Gatsl2, Sytl2, Trps1, Zkscan8, Narg2, Pard6g, Cadm3, Wwtr1, Hadha, Usp6nl, Tm9sf4, Garnl3, Mdn1, Osbpl9, Pds5b, Nfxl1, Akap9, Maml1, Cnot6, Rnf44, Ankrd28, Fam19a5, Ankrd12, Scamp1, Chd4, Pip4k2b, Galnt7, Oxsr1, 2700081O15Rik, Zzz3, Zzz3, Zzz3, Zzz3, Ank2, Pygb, Rap1gap, Spred2, Baz2a, Pip4k2c, Caln1, Slc17a6, Hpcal4, Mtmr4, Rbm39, Cd99l2, Fam195b, Ash1l, Lrrc4, Arhgdia, Zzef1, Csrnp2, Snx30, Nudcd3, Papd7, Zfyve26, Klhl32, Rassf4, Kmt2a, Vezt, Slc43a2, F*

---

---

*am73a,Cnksr3,Nlgn2,Cdc27,Nploc4,Mbip,4933426M11Rik,Pacs2,Mtmr6, March6,Pim3,Adcy5,Cldn25,Enpp4,Zfp521,Patl1,Ablim1,Smg7,Lpgat1,G igyf2,Ppig,Rhov,Frmd5,Ralgapb,Stx16,Syt11,Cpeb2,Fbxl18,Jazf1,Wnk1,Z fp592,Cog7,Cog7,Cog7,Whsc1l1,Psd3,Scn3b,Osbpl8,Gpatch8,Lnpep,Tor 1aip2,Fam171b,Impad1,Slc35d1,Wasf2,Rsbn1l,Gprin3,C230081A13Rik,I qsec2,Pcmtd2,Usp7,Prnt1,Gga3,Alkbh5,Zfp652,Lsamp,Rab6b,Shc4,Klhl2 3,Snhg11,Hs3st5,Rc3h2,Zmat4,Tacc1,Lrrc58,Ric3,Pptc7,Frs2,Gfod1,Zmiz 1,Zfp414,Zfp516,Myo18a,Intu,Ccnjl,Fndc5,Scn4b,Gnptab,Lrp3,Dos*

mmu-miR-338-  
5p      down

*Adam9,Bcl2l11,Cxadr,Dck,Ereg,Gfra2,Il17ra,Itga4,Plaur,Tec,Tnfrsf10b,Z eb2,Map2k7,Mplkip,Zcchc10,Rbm28,Rbm28,Hnrnpul2,Sash1,Sash1,Col2 4a1,Crebrf,Csgalnact2,Ankrd17,Ifi44,Boc,Gpkow,Fam46a,Zfp609,Pcdh2 0,Tiplr,Slc35a3,Elfn1,Ctdspl2,Cecr2,Lekr1*

mmu-miR-351-  
5p      down

*E2f3,Il1rn,Il1rn,Foxk1,Mtf1,Siah2,Stat1,Tnf,Jmy,Snrnp40,Aph1c,Antxr2,D qx1,Lars2,Wdr25,Madd,Mgat4a,Tspan12,Hif1an,Gm14137,Trim71*

mmu-miR-181b  
-5p      down

*SIX2,Aicda,Ak4,Ap1g1,Aqp3,Atp2a2,Atp5g1,Casp3,Ebf3,Gch1,Hspa5,H2- D1,Hk2,Magea5,Mxi1,Ndr1,Cd244,Rad51d,Smarca4,Spp1,Timp3,Tulp3 ,Uchl1,Ikzf2,Cbx7,Higd1a,Pdpx,Ms4a4c,Sc4mol,Nacc1,Lnp,Zfp689,Osbpl 3,Ulk3,Pitpnc1,Errfi1,4930563E22Rik,Tmem14a,Slc35d3,Fam122b,Trim2 ,Sgpp1,Clmn,Adamts9,Snx25,Pfkfb3,Itpk1,Fam160b2,Fam69c,Bnc2,Ptch d2,Stk32a,Dagla,Gpd1l,Ccdc58,Arhgef15,*

mmu-miR-125b  
-1-3p      down

*Nkx2-5,Srf,Prpf8*

mmu-miR-674-  
5p      down

*Ankfy1,Atrn,Bach2,Cflar,Cxcr2,Ccr9,Comt,Cx3cr1,Cyp2e1,Ddx3x,H2-T23,I l15ra,Irak1,Mbp,Myo1c,Naip5,Ogdh,Ogdh,Pcsk6,Pol2,Pol2,Rab33b,R bbp4,Sap18,Slc23a1,Med22,T2,Ubp1,Ywhag,Scd3,Rbm34,Banp,Tyk2,Ni p7,Rpl7l1,Polr2l,Srp72,Magt1,Ccdc25,Ppil4,Spc24,Pbld1,Dph5,Mfsd11,A rl16,Tspan15,Zfp935,Wdr89,Fam177a,Dcaf4,Asxl2,1700016D06Rik,Anks 1b,Myh10,Ypel2,Nol3,Clca2,Zfp202,Mpv17l,Loxl2,Loxl2,Commd7,Ssr1,Ce npf,Prps2,Aipl1,Bzrap1,Churc1,Cpne9,Pla2g4b,Tapbpl,Synrg,Rmi2,Tbc1d 24,Rin1,Exosc2,Tmem69,Nup133,Sh3rf3,Brip1,Slc7a14,D3Ertd254e,Slc2 2a15,Ppm1k,Ppp2r2c,A230046K03Rik,Casc4,Dennd5b,Slfn5,Lcmt2,Zyg1 1b,Mfsd2b,Zfp607,Zfp605,1700047117Rik2,AK010878,Gm10778*

---

**Supplementary Table S4** DE miRNA target GO classification ( $P < 0.0001$ )

| Terms                                     | Count | Fold enrichment | P-value               | catalogue           |
|-------------------------------------------|-------|-----------------|-----------------------|---------------------|
| phosphorus metabolic process              | 81    | 2.02            | $1.44 \times 10^{-9}$ | Biology process     |
| phosphate metabolic process               | 81    | 2.02            | $1.44 \times 10^{-9}$ | Biology process     |
| phosphorylation                           | 66    | 1.99            | $1.23 \times 10^{-7}$ | Biology process     |
| protein amino acid phosphorylation        | 59    | 1.99            | $5.92 \times 10^{-7}$ | Biology process     |
| regulation of MAP kinase activity         | 16    | 4.12            | $5.94 \times 10^{-6}$ | Biology process     |
| heart development                         | 27    | 2.62            | $1.29 \times 10^{-5}$ | Biology process     |
| small GTPase mediated signal transduction | 29    | 2.43            | $2.34 \times 10^{-5}$ | Biology process     |
| regulation of system process              | 24    | 2.58            | $5.44 \times 10^{-5}$ | Biology process     |
| intracellular signaling cascade           | 69    | 1.63            | $5.87 \times 10^{-5}$ | Biology process     |
| protein kinase cascade                    | 26    | 2.38            | $9.38 \times 10^{-5}$ | Biology process     |
| synapse                                   | 37    | 2.58            | $3.26 \times 10^{-7}$ | Cellular components |
| vesicle                                   | 50    | 2.14            | $6.37 \times 10^{-7}$ | Cellular components |
| membrane-bounded vesicle                  | 43    | 2.27            | $9.38 \times 10^{-7}$ | Cellular components |
| cell soma                                 | 20    | 3.80            | $1.05 \times 10^{-6}$ | Cellular components |
| insoluble fraction                        | 50    | 2.10            | $1.05 \times 10^{-6}$ | Cellular components |
| cytoplasmic membrane-bounded vesicle      | 42    | 2.25            | $1.62 \times 10^{-6}$ | Cellular components |

---

|                               |     |      |                       |                     |
|-------------------------------|-----|------|-----------------------|---------------------|
| membrane fraction             | 48  | 2.09 | $2.14 \times 10^{-6}$ | Cellular components |
| plasma membrane               | 178 | 1.36 | $2.79 \times 10^{-6}$ | Cellular components |
| cytoplasmic vesicle           | 47  | 2.05 | $4.48 \times 10^{-6}$ | Cellular components |
| cell fraction                 | 52  | 1.94 | $6.74 \times 10^{-6}$ | Cellular components |
| synapse part                  | 26  | 2.72 | $9.76 \times 10^{-6}$ | Cellular components |
| plasma membrane part          | 110 | 1.50 | $9.90 \times 10^{-6}$ | Cellular components |
| neuron projection             | 28  | 2.54 | $1.51 \times 10^{-5}$ | Cellular components |
| cell junction                 | 42  | 1.98 | $3.55 \times 10^{-5}$ | Cellular components |
| protein kinase activity       | 54  | 1.97 | $2.68 \times 10^{-6}$ | Molecular function  |
| cytoskeletal protein binding  | 39  | 2.01 | $5.82 \times 10^{-5}$ | Molecular function  |
| ribonucleotide binding        | 119 | 1.41 | $6.46 \times 10^{-5}$ | Molecular function  |
| purine ribonucleotide binding | 119 | 1.41 | $6.46 \times 10^{-5}$ | Molecular function  |
| adenyl ribonucleotide binding | 100 | 1.46 | $8.68 \times 10^{-5}$ | Molecular function  |
| ATP binding                   | 99  | 1.46 | $9.06 \times 10^{-5}$ | Molecular function  |
| metal ion binding             | 224 | 1.24 | $9.50 \times 10^{-5}$ | Molecular function  |

---

**Supplementary Table S5** DE miRNA target pathway ( $P < 0.0001$ ).

| pathway                        | count | genes                                                                                                                                                                                                   | Fold enrichment | P-value               |
|--------------------------------|-------|---------------------------------------------------------------------------------------------------------------------------------------------------------------------------------------------------------|-----------------|-----------------------|
| Neurotrophin signaling pathway | 21    | <i>Irak1, Map2k1, Braf, Camk2g, Rela, Ywhab, Ptpn11, Akt1, Ywhag, Crkl, Mapk14, Ntrk2, Gab1, Pik3ca, Mapk9, Ngfrap1, Abl1, Frs2, Map2k7, Arhgdia, Shc4</i>                                              | 3.37            | $2.75 \times 10^{-6}$ |
| Pancreatic cancer              | 15    | <i>E2f3, Map2k1, Braf, Rela, Tgfbr2, Smad4, Smad3, Stat1, Ralgds, Akt1, Acvr1b, Rac2, Ikbkg, Pik3ca, Mapk9</i>                                                                                          | 4.35            | $5.65 \times 10^{-6}$ |
| Colorectal cancer              | 16    | <i>Dvl2, Map2k1, Braf, Tgfbr2, Smad4, Smad3, Ralgds, Ctnnb1, Akt1, Igf1r, Acvr1b, Casp3, Rac2, Pik3ca, Mapk9, Pdgfrb</i>                                                                                | 3.88            | $1.06 \times 10^{-5}$ |
| Chronic myeloid leukemia       | 15    | <i>E2f3, Map2k1, Braf, Rela, Tgfbr2, Smad4, Smad3, Ptpn11, Akt1, Acvr1b, Crkl, Ikbkg, Pik3ca, Abl1, Shc4</i>                                                                                            | 4.12            | $1.09 \times 10^{-5}$ |
| ErbB signaling pathway         | 15    | <i>Braf, Map2k1, Camk2g, Prkcb, Akt1, Crkl, Ereg, Nck1, Gab1, Pik3ca, Mapk9, Abl1, Abl2, Map2k7, Shc4</i>                                                                                               | 3.60            | $5.36 \times 10^{-5}$ |
| MAPK signaling pathway         | 27    | <i>Il1r1, Tnf, Ppp3r1, Srf, Map3k7, Akt1, Acvr1b, Casp3, Rac2, Dusp16, Map2k7, Braf, Map2k1, Rela, Ptpn5, Nf1, Tgfbr2, Cacna2d3, Prkcb, Crkl, Mapk14, Ntrk2, Ikbkg, Mapk9, Pdgfrb, Map3k14, Pla2g4b</i> | 2.13            | $3.27 \times 10^{-4}$ |
| Chemokine signaling pathway    | 21    | <i>Adcy1, Map2k1, Braf, Rock2, Adcy5, Rela, Cxcr2, Stat1,</i>                                                                                                                                           | 2.41            | $3.80 \times 10^{-4}$ |



---

|               |    |                                                                                                                                 |      |                       |
|---------------|----|---------------------------------------------------------------------------------------------------------------------------------|------|-----------------------|
|               |    | <i>Cxcl12, Prkcb, Elmo1, Akt1, Ccr9, Crkl, Rac2, Gnb1, Cx3cr1, Ikbkg, Pik3ca, Shc4, Gng7</i>                                    |      |                       |
| Axon guidance | 17 | <i>Ablim1, Plxna2, Rock2, Ppp3r1, L1cam, Dpysl2, Ephb3, Cxcl12, Epha4, Sema4g, Rac2, Unc5b, Cfl2, Nck1, Efna5, Abl1, Sema4a</i> | 2.71 | $4.55 \times 10^{-4}$ |
| Apoptosis     | 13 | <i>Akt1, Cflar, Irak1, Il1r1, Casp3, Tnfrsf10b, Tnf, Rela, Il1rap, Ikbkg, Ppp3r1, Pik3ca, Map3k14</i>                           | 3.12 | $7.90 \times 10^{-4}$ |

---
